# Supplementary material for: Thyroid Cancer Incidence around the Belgian Nuclear Sites, 2000–2014
Source: MDPI journal article supplement (doi:10.3390/ijerph14090988), 2017-08-31
Supplement: s1 [file s1]

**Table S1.** Rate ratios of thyroid between 2000 (2004) and 2014 for the 0–5, 5–10, 10–15, and 15–20 km proximity area around each nuclear site and the four Belgian nuclear sites together.

| Distance to the<br>Nuclear Site (km) | PY         | O   | E       | Est. | RR <sup>a</sup><br>95% CI |
|--------------------------------------|------------|-----|---------|------|---------------------------|
| Doel <sup>b</sup> (2000-2014)        |            |     |         |      |                           |
| (0–5)                                | -          | -   | -       | -    | -                         |
| (5–10)                               | 953,438    | 34  | 49.02   | 0.68 | (0.49,0.95)               |
| (10–15)                              | 938,112    | 46  | 49.08   | 0.93 | (0.70,1.24)               |
| (15–20)                              | 9,690,645  | 382 | 492.77  | 0.77 | (0.69,0.85)               |
| Tihange <sup>c</sup> (2004-2014)     |            |     |         |      |                           |
| (0–5)                                | 375,054    | 28  | 38.57   | 0.72 | (0.50,1.03)               |
| (5–10)                               | 576,484    | 59  | 59.69   | 0.99 | (0.77,1.27)               |
| (10–15)                              | 594,853    | 38  | 61.79   | 0.61 | (0.45,0.83)               |
| (15–20)                              | 1,821,687  | 149 | 190.01  | 0.78 | (0.66,0.91)               |
| Mol-Dessel <sup>b</sup> (2000-2014)  |            |     |         |      |                           |
| (0–5)                                | 632,633    | 43  | 32.95   | 1.30 | (0.97,1.74)               |
| (5–10)                               | 1,412,427  | 80  | 72.84   | 1.09 | (0.88,1.35)               |
| (10–15)                              | 524,841    | 27  | 26.89   | 0.99 | (0.69,1.43)               |
| (15–20)                              | 3,716,026  | 190 | 190.85  | 0.98 | (0.85,1.13)               |
| Fleurus <sup>c</sup> (2004-2014)     |            |     |         |      |                           |
| (0–5)                                | 368,755    | 41  | 38.26   | 1.07 | (0.80,1.44)               |
| (5–10)                               | 3,124,616  | 351 | 320.81  | 1.10 | (0.99,1.22)               |
| (10–15)                              | 1,274,241  | 137 | 133.25  | 1.03 | (0.87,1.21)               |
| (15–20)                              | 1,436,902  | 156 | 148.45  | 1.05 | (0.90,1.23)               |
| All sites                            |            |     |         |      |                           |
| (0–5)                                | 1,376,442  | 112 | 109.77  | 1.02 | (0.86,1.22)               |
| (5–10)                               | 6,066,965  | 524 | 502.36  | 1.05 | (0.97,1.14)               |
| (10–15)                              | 3,332,047  | 248 | 271.01  | 0.93 | (0.82,1.04)               |
| (15–20)                              | 16,665,260 | 877 | 1022.09 | 0.84 | (0.79,0.89)               |

PY: person-years at risk; O: observed number of cases; E: expected number of cases; Est. : estimate; 95% CI: 95% Wald confidence interval. <sup>a</sup> RR: rate ratios adjusted for age, sex, incidence year and region; <sup>b</sup> Flemish Region as reference region; <sup>c</sup> Walloon/Brussels-Capital Region as reference region.
